# Supplementary material for: Structural and Functional Alterations of Substantia Nigra and Associations With Anxiety and Depressive Symptoms Following Traumatic Brain Injury
Source: Front Neurol. 2022 Apr 5;13:719778. doi: 10.3389/fneur.2022.719778 (PMC9017679; doi:10.3389/fneur.2022.719778)
Supplement: Supplementary file 1 [file Table_1.XLSX]

## Sheet: Table_1 data
TBI group
	gender	age	education	GCS	time since injury	GOSE	memory	HADS_A	HADS_D
TBI_01	1	30	15	13	6	7	61.5	2	1
TBI_02	2	31	15	15	17	8	45	9	4
TBI_03	2	22	15	15	6	8	62	2	0
TBI_04	2	36	6	13	11	7	36.5	6	4
TBI_05	1	48	1	14	6	4	22	18	16
TBI_06	2	46	6	14	2	5	24.5	16	18
TBI_07	1	26	16	15	4	8	56	8	7
TBI_08	1	29	9	7	4	4	18	1	0
TBI_09	2	36	12	15	5	7	55.5	10	6
TBI_10	2	41	8	15	10	7	33.5	4	8
TBI_11	1	46	5	8	6	4	34	5	3
TBI_12	1	33	9	12	11	4	35	14	19
TBI_13	2	43	9	12	8	7	47.5	6	0
TBI_14	2	45	2	12	3	5	17	1	5
TBI_15	2	38	5	7	4	5	40	11	13
TBI_16	2	24	9	8	25	7	58.5	5	2
TBI_17	2	51	2	9	2	5	25	6	6
TBI_18	2	45	9	15	17	7	41	7	10
TBI_19	1	28	16	14	7	8	66.5	4	1
TBI_20	2	21	12	11	5	8	44.5	5	3
TBI_21	2	46	9	15	2	5	37.5	13	9
TBI_22	2	52	5	13	5	6	20.5	14	11
TBI_23	2	48	5	6	4	5	29	12	15
TBI_24	1	29	16	15	27	7	48.5	7	9
TBI_25	1	22	9	14	1	5	39.5	12	6
TBI_26	1	23	9	14	4	6	51	7	5
TBI_27	2	22	9	14	15	5	34	6	10
TBI_28	2	26	12	14	24	6	34.5	17	7
TBI_29	2	25	12	14	4	7	49.5	5	10
TBI_30	1	47	9	14	12	5	24	14	21
Healthy control
	gender	age	education	memory	HADS-A	HADS-D
HC_01	2	23	15	63	6	4
HC_02	2	37	9	57	4	5
HC_03	1	28	16	62	2	0
HC_04	2	46	9	48.5	4	3
HC_05	1	41	9	46	7	4
HC_06	1	47	9	52	2	5
HC_07	2	32	9	52	3	6
HC_08	1	47	2	45	4	1
HC_09	1	40	9	52.5	6	2
HC_10	2	24	9	47.5	7	2
HC_11	2	21	9	57	0	0
HC_12	2	30	2	41	3	0
HC_13	2	22	8	42	7	1
HC_14	2	31	12	46.5	1	4
HC_15	1	31	12	60.5	5	3
HC_16	2	22	5	51.5	11	6
HC_17	2	23	9	55	6	7
HC_18	2	44	5	47	3	1
HC_19	2	42	9	45	3	2
HC_20	2	28	16	68	4	1

## Sheet: Table_2 data
The voxel Z threshold for voxel p threshold 0.001000 is: 3.090232.
The Minimum cluster size for voxel p threshold 0.001000 and cluster p threshold 0.050000 is: 29.000000 voxels
This cluster size threshold is going to be applied on the original T statistical image.
I.e., you are looking at a thresholded T statistical image now.
The voxel T threshold for voxel p threshold 0.001000 is: 3.272912.
This report is based on CUI Xu's xjview. (http://www.alivelearn.net/xjview/)
Revised by YAN Chao-Gan and ZHU Wei-Xuan 20091108: suitable for different Cluster Connectivity Criterion: surface connected, edge connected, corner connected.
No cluster is found. So no report will be generated.
The voxel Z threshold for voxel p threshold 0.001000 is: 3.090232.
The Minimum cluster size for voxel p threshold 0.001000 and cluster p threshold 0.050000 is: 27.000000 voxels
This cluster size threshold is going to be applied on the original T statistical image.
I.e., you are looking at a thresholded T statistical image now.
The voxel T threshold for voxel p threshold 0.001000 is: 3.272912.
This report is based on CUI Xu's xjview. (http://www.alivelearn.net/xjview/)
Revised by YAN Chao-Gan and ZHU Wei-Xuan 20091108: suitable for different Cluster Connectivity Criterion: surface connected, edge connected, corner connected.
Number of clusters found: 2
----------------------
Cluster 1
Number of voxels: 67
Peak MNI coordinate: -12 51 18
Peak MNI coordinate region: // Left Cerebrum // Frontal Lobe // Medial Frontal Gyrus // White Matter // undefined // Frontal_Sup_Medial_L (aal)
Peak intensity: -4.6247
# voxels	structure
67	--TOTAL # VOXELS--
52	Frontal Lobe
49	Medial Frontal Gyrus
34	White Matter
34	Right Cerebrum
31	Frontal_Sup_Medial_L (aal)
20	Frontal_Sup_Medial_R (aal)
19	Gray Matter
19	Left Cerebrum
16	brodmann area 10
14	Inter-Hemispheric
8	Cingulum_Ant_R (aal)
6	Frontal_Sup_R (aal)
3	brodmann area 9
3	Superior Frontal Gyrus
2	Cingulum_Ant_L (aal)
----------------------
Cluster 2
Number of voxels: 53
Peak MNI coordinate: -45 -66 36
Peak MNI coordinate region: // Left Cerebrum // Parietal Lobe // Angular Gyrus // White Matter // undefined // Angular_L (aal)
Peak intensity: -4.771
# voxels	structure
53	--TOTAL # VOXELS--
52	Left Cerebrum
51	Parietal Lobe
47	Angular_L (aal)
34	White Matter
24	Inferior Parietal Lobule
23	Angular Gyrus
18	Gray Matter
9	brodmann area 39
6	brodmann area 7
6	Parietal_Inf_L (aal)
3	brodmann area 40
2	Supramarginal Gyrus
2	Superior Parietal Lobule
1	Temporal Lobe
1	Middle Temporal Gyrus

## Sheet: Table_3 data
TBI group
	gender	age	education	memory	HADS_A	HADS_D	Frontal_Sup_Medial_L	Angular_L	TIV
TBI_01	1	30	15	61.5	2	1	0.06	0.08	1536.84
TBI_02	2	31	15	45	9	4	0.04	0.11	1687.89
TBI_03	2	22	15	62	2	0	0.18	0.1	1546.88
TBI_04	2	36	6	36.5	6	4	0.11	0.09	1503.04
TBI_05	1	48	1	22	18	16	0.2	0.3	1334.1
TBI_06	2	46	6	24.5	16	18	0.11	0.22	1373.45
TBI_07	1	26	16	56	8	7	0.26	-0.01	1461.97
TBI_08	1	29	9	18	1	0	0.16	0.13	1281.81
TBI_09	2	36	12	55.5	10	6	0.21	0.23	1577.39
TBI_10	2	41	8	33.5	4	8	0.11	0.03	1553.66
TBI_11	1	46	5	34	5	3	0.06	-0.14	1403.47
TBI_12	1	33	9	35	14	19	0.18	0.23	1516.77
TBI_13	2	43	9	47.5	6	0	0.34	0.34	1472.22
TBI_14	2	45	2	17	1	5	0.06	-0.07	1394.95
TBI_15	2	38	5	40	11	13	0.1	0.03	1389.99
TBI_16	2	24	9	58.5	5	2	0.02	0.21	1460.95
TBI_17	2	51	2	25	6	6	0.08	0.14	1506.07
TBI_18	2	45	9	41	7	10	0	0.12	1859.83
TBI_19	1	28	16	66.5	4	1	0.17	0.22	1478.73
TBI_20	2	21	12	44.5	5	3	0.14	0.28	1611.56
TBI_21	2	46	9	37.5	13	9	0.02	0.23	1523.6
TBI_22	2	52	5	20.5	14	11	-0.15	0.15	1451.24
TBI_23	2	48	5	29	12	15	0.08	0.07	1628.17
TBI_24	1	29	16	48.5	7	9	0.19	0.22	1519.45
TBI_25	1	22	9	39.5	12	6	0.4	0.27	1433.55
TBI_26	1	23	9	51	7	5	0.14	0.17	1348.06
TBI_27	2	22	9	34	6	10	-0.01	0.05	1730.06
TBI_28	2	26	12	34.5	17	7	0.01	0.27	1608.97
TBI_29	2	25	12	49.5	5	10	0.1	0.04	1484.53
TBI_30	1	47	9	24	14	21	0.29	0.14	1416.39
Healthy control
	gender	age	education	memory	HADS_A	HADS_D	Frontal_Sup_Medial_L	Angular_L	TIV
HC_01	2	23	15	63	6	4	0.3	0.43	1812.05
HC_02	2	37	9	57	4	5	0.23	0.37	1666.27
HC_03	1	28	16	62	2	0	0.3	0.23	1519.77
HC_04	2	46	9	48.5	4	3	0.23	0.17	1559.58
HC_05	1	41	9	46	7	4	0.18	0.37	1468.33
HC_06	1	47	9	52	2	5	0.31	0.33	1349.72
HC_07	2	32	9	52	3	6	0.4	0.4	1542.86
HC_08	1	47	2	45	4	1	0.37	0.47	1442.25
HC_09	1	40	9	52.5	6	2	0.34	0.22	1477.8
HC_10	2	24	9	47.5	7	2	0.43	0.27	1404.67
HC_11	2	21	9	57	0	0	0.26	0.25	1685.33
HC_12	2	30	2	41	3	0	0.24	0.33	1654.92
HC_13	2	22	8	42	7	1	0.37	0.41	1667.75
HC_14	2	31	12	46.5	1	4	0.24	0.36	1670.6
HC_15	1	31	12	60.5	5	3	0.18	0.2	1374.54
HC_16	2	22	5	51.5	11	6	0.31	0.08	1706.83
HC_17	2	23	9	55	6	7	0.17	0.34	1480.53
HC_18	2	44	5	47	3	1	0.23	0.21	1369.68
HC_19	2	42	9	45	3	2	0.27	0.31	1596.52
HC_20	2	28	16	68	4	1	0.26	0.31	1948.28

## Sheet: Figure_2 data
TBI group
	SN_L	SN_R	TIV	gender	age	education
TBI_01	1141	1299	1536.84	1	30	15
TBI_02	1050	1443	1687.89	2	31	15
TBI_03	1327	1321	1546.88	2	22	15
TBI_04	1190	1406	1503.04	2	36	6
TBI_05	1014	1367	1334.1	1	48	1
TBI_06	1066	1408	1373.45	2	46	6
TBI_07	1164	1417	1461.97	1	26	16
TBI_08	1030	1285	1281.81	1	29	9
TBI_09	1035	1280	1577.39	2	36	12
TBI_10	1008	1313	1553.66	2	41	8
TBI_11	1024	1435	1403.47	1	46	5
TBI_12	1214	1218	1516.77	1	33	9
TBI_13	1136	1381	1472.22	2	43	9
TBI_14	1024	1292	1394.95	2	45	2
TBI_15	1102	1217	1389.99	2	38	5
TBI_16	1403	1397	1460.95	2	24	9
TBI_17	1255	1469	1506.07	2	51	2
TBI_18	1374	1315	1859.83	2	45	9
TBI_19	1180	1236	1478.73	1	28	16
TBI_20	1246	1371	1611.56	2	21	12
TBI_21	1300	1366	1523.6	2	46	9
TBI_22	1167	1439	1451.24	2	52	5
TBI_23	1062	1453	1628.17	2	48	5
TBI_24	1306	1363	1519.45	1	29	16
TBI_25	1219	1408	1433.55	1	22	9
TBI_26	1258	1213	1348.06	1	23	9
TBI_27	1207	1338	1730.06	2	22	9
TBI_28	1067	1421	1608.97	2	26	12
TBI_29	1064	1435	1484.53	2	25	12
TBI_30	1098	1364	1416.39	1	47	9
Healthy control
	SN_L	SN_R	TIV	gender	age	education
HC_01	1331	1300	1812.05	2	23	15
HC_02	1339	1446	1666.27	2	37	9
HC_03	1352	1382	1519.77	1	28	16
HC_04	1550	1430	1559.58	2	46	9
HC_05	1584	1466	1468.33	1	41	9
HC_06	1444	1430	1349.72	1	47	9
HC_07	1578	1570	1542.86	2	32	9
HC_08	1507	1683	1442.25	1	47	2
HC_09	1512	1625	1477.8	1	40	9
HC_10	1598	1359	1404.67	2	24	9
HC_11	1310	1661	1685.33	2	21	9
HC_12	1617	1309	1654.92	2	30	2
HC_13	1482	1608	1667.75	2	22	8
HC_14	1355	1404	1670.6	2	31	12
HC_15	1678	1407	1374.54	1	31	12
HC_16	1618	1422	1706.83	2	22	5
HC_17	1405	1540	1480.53	2	23	9
HC_18	1639	1617	1369.68	2	44	5
HC_19	1654	1709	1596.52	2	42	9
HC_20	1633	1463	1948.28	2	28	16
TBI_subtype
TBI with focal lesion					TBI without foal lesion
	SN_L	SN_R			SN_L	SN_R
TBI_01	1141	1299		TBI_02	1050	1443
TBI_03	1327	1321		TBI_07	1164	1417
TBI_04	1190	1406		TBI_09	1035	1280
TBI_05	1014	1367		TBI_18	1374	1315
TBI_06	1066	1408		TBI_19	1180	1236
TBI_08	1030	1285		TBI_20	1246	1371
TBI_10	1008	1313		TBI_30	1098	1364
TBI_11	1024	1435
TBI_12	1214	1218
TBI_13	1136	1381
TBI_14	1024	1292
TBI_15	1102	1217
TBI_16	1403	1397
TBI_17	1255	1469
TBI_21	1300	1366
TBI_22	1167	1439
TBI_23	1062	1453
TBI_24	1306	1363
TBI_25	1219	1408
TBI_26	1258	1213
TBI_27	1207	1338
TBI_28	1067	1421
TBI_29	1064	1435
